# Supplementary material
Source: ML conference proceedings conference paper supplement (https://openaccess.thecvf.com/content/ACCV2022/html/Fragomeni_ConTra_Context_Transformer_ACCV_2022_paper.html)
Supplement: Supplementary file 2 [file Fragomeni_ConTra_Context_Transformer_ACCV_2022_supplemental.zip]

Archive with 2 entries (2 files):
- 0676-supp.pdf
- video.mp4
